# Supplementary material for: Plasticity-Driven Self-Organization under Topological Constraints Accounts for Non-random Features of Cortical Synaptic Wiring
Source: PLOS journal article supplement (doi:10.1371/journal.pcbi.1004759), 2016-02-11
Supplement: S5 (10.1371/journal.pcbi.1004759.s005) [file journal.pcbi.1004759.s005.PDF]

| features                              | Spearman's $\rho$ | P-value    |
|---------------------------------------|-------------------|------------|
| spike correlation and synaptic weight | $\rho = 0.32$     | $P = 0.00$ |
| spike correlation and separation      | $\rho = -0.02$    | $P = 0.04$ |
| synaptic weight and separation        | $\rho = -0.01$    | $P = 0.46$ |
